# Supplementary material
Source: HighWire-hosted journal article supplement (https://ajnr-sso.highwirestaging.com/highwire/filestream/52347/field_highwire_adjunct_files/0/3147_tables.pdf)
Supplement: 3147_tables.pdf [file 3147_tables.pdf]

**On-line Table 1: Diagnostic criteria for IgG4+ Mikulicz disease<sup>11</sup>  
(approved by the Japanese Society for Sjögren's Syndrome, 2008)**

Symmetrical swelling of at least 2 pairs of lachrymal, parotid, or submandibular glands continuing for at least 3 months and Elevated serum IgG4 (>135 mg/dl); or Histopathological features including lymphocyte and IgG4+ plasma cell infiltration (IgG4+ plasma cells/IgG+ plasma cells >50%) with typical tissue fibrosis or sclerosis

Differential diagnosis is necessary to distinguish IgG4+ Mikulicz disease from other distinct disorders, including sarcoidosis, Castleman disease, Wegener granulomatosis, lymphoma, and cancer. The diagnostic criteria for Sjögren syndrome (SS) may also include some patients with IgG4+ Mikulicz disease; however, the clinicopathologic conditions of patients with typical SS and IgG4+ Mikulicz disease are different.

**On-line Table 2: Summary of affected sites, including other organs in 15 patients**

| Case/<br>Age/<br>Sex | Lacrimal<br>Gland<br>Enlargement | Intraorbital<br>Mass | Cranial<br>Nerve<br>Enlargement | Pituitary<br>Gland<br>Enlargement | Dural<br>Thickening | SMG<br>Enlargement | Other<br>CNS HN<br>Lesions | AIP | Other<br>Abdominal<br>Lesion | Chest<br>Lesion |
|----------------------|----------------------------------|----------------------|---------------------------------|-----------------------------------|---------------------|--------------------|----------------------------|-----|------------------------------|-----------------|
| 1/73/M               | + bil                            |                      | + (V2; ION)                     | + (St, PL)                        |                     |                    |                            | —   |                              |                 |
| 2/68/M               | + bil                            |                      |                                 |                                   |                     |                    |                            | —   |                              | Lung            |
| 3/53/M               | + bil                            |                      | + (V2; ION)                     |                                   |                     |                    |                            | —   |                              |                 |
| 4/73/F               | + bil                            |                      |                                 |                                   |                     |                    |                            | +   | Bile duct                    |                 |
| 5/67/M               |                                  | +                    | + (V1; FN, CS)                  |                                   |                     |                    |                            | —   |                              |                 |
| 6/62/M               | + bil                            | +                    |                                 | + (St, PL, AL)                    |                     |                    |                            | +   |                              | Lung            |
| 7/72/M               | + bil                            | +                    |                                 |                                   | +                   | +                  |                            | —   | Kidney                       |                 |
| 8/66/M               |                                  | +                    | + (CS)                          |                                   | +                   |                    |                            | —   |                              | MF              |
| 9/50/M               | + bil                            | +                    |                                 |                                   |                     |                    |                            | +   |                              |                 |
| 10/59/M              |                                  |                      | + (CS)                          | + (St, PL, AL)                    | +                   |                    |                            | +   | Kidney, RPF                  | Lung            |
| 11/59/M              |                                  |                      | + (V2; ION)                     | + (St, PL)                        | +                   |                    |                            | +   | RPF                          | Hilar LNs       |
| 12/61/M              |                                  |                      |                                 |                                   |                     | +                  |                            | +   | RPF                          | Lung, hilar LNs |
| 13/45/M              | + bil                            |                      |                                 |                                   |                     |                    |                            | —   |                              |                 |
| 14/65/F              |                                  |                      |                                 |                                   |                     | +                  |                            | —   | RPF                          |                 |
| 15/35/F              |                                  |                      | + (V2; ION)                     | + (St, PL)                        |                     |                    | Multiple <sup>a</sup>      | —   | •                            | •               |

+ indicates presence; —, absence of a lesion; bil, bilateral; V1, first division of the trigeminal nerve (Vth nerve); V2, second division of the trigeminal nerve; FN, frontal nerve; CS, cavernous sinus; ION, infraorbital nerve; St, pituitary stalk; PL, posterior lobe; AL, anterior lobe; SMG, submandibular gland; AIP, autoimmune pancreatitis; RPF, retroperitoneal fibrosis; MF, mediastinal fibrosis; LN, = lymph node.

<sup>a</sup> paranasal sinusitis, facial nerve lesion with otitis media, concentric thickening of the vertebral artery, and nerve root lesion.
